# Supplementary material for: The effect of patent Dictyocaulus viviparus (re)infections on individual milk yield and milk quality in pastured dairy cows and correlation with clinical signs
Source: PubMed Central journal article supplement (PMC5759297; doi:10.1186/s13071-017-2602-x), 2018-01-08
Supplement: 13071_2017_2602_MOESM1_ESM.pdf [file 13071_2017_2602_MOESM1_ESM.pdf]

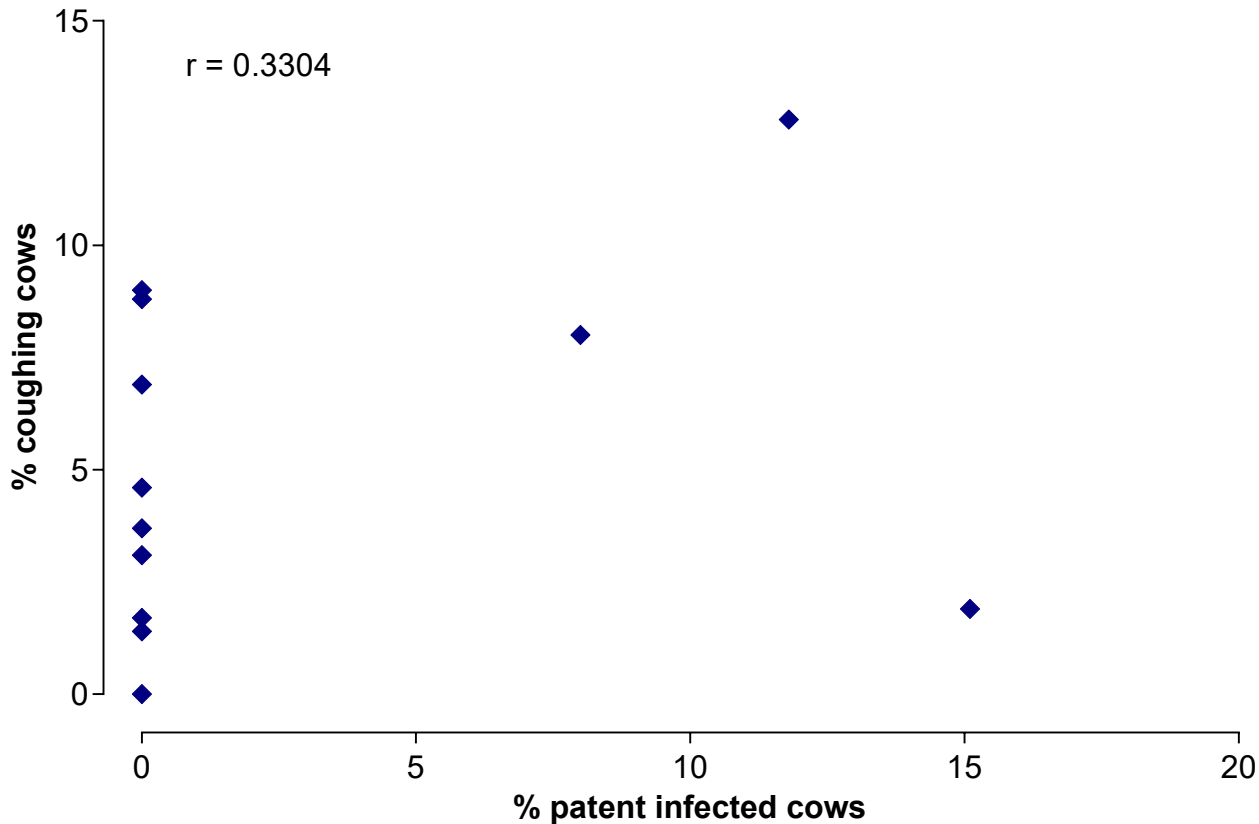

**Additional file 1:** Correlation between the percentage of coughing cows and the percentage of patent *D. viviparus*-infected cows on the 17 farms in autumn 2015.
